# Supplementary material for: GABAergic Gene Expression in Postmortem Hippocampus from Alcoholics and Cocaine Addicts; Corresponding Findings in Alcohol-Naïve P and NP Rats
Source: PLOS journal article supplement (doi:10.1371/journal.pone.0029369), 2012-01-13
Supplement: S4 (10.1371/journal.pone.0029369.s004) [file journal.pone.0029369.s004]

**FIGURE S4: Gene Expression in Individual Alcoholics Compared with Individual Controls**

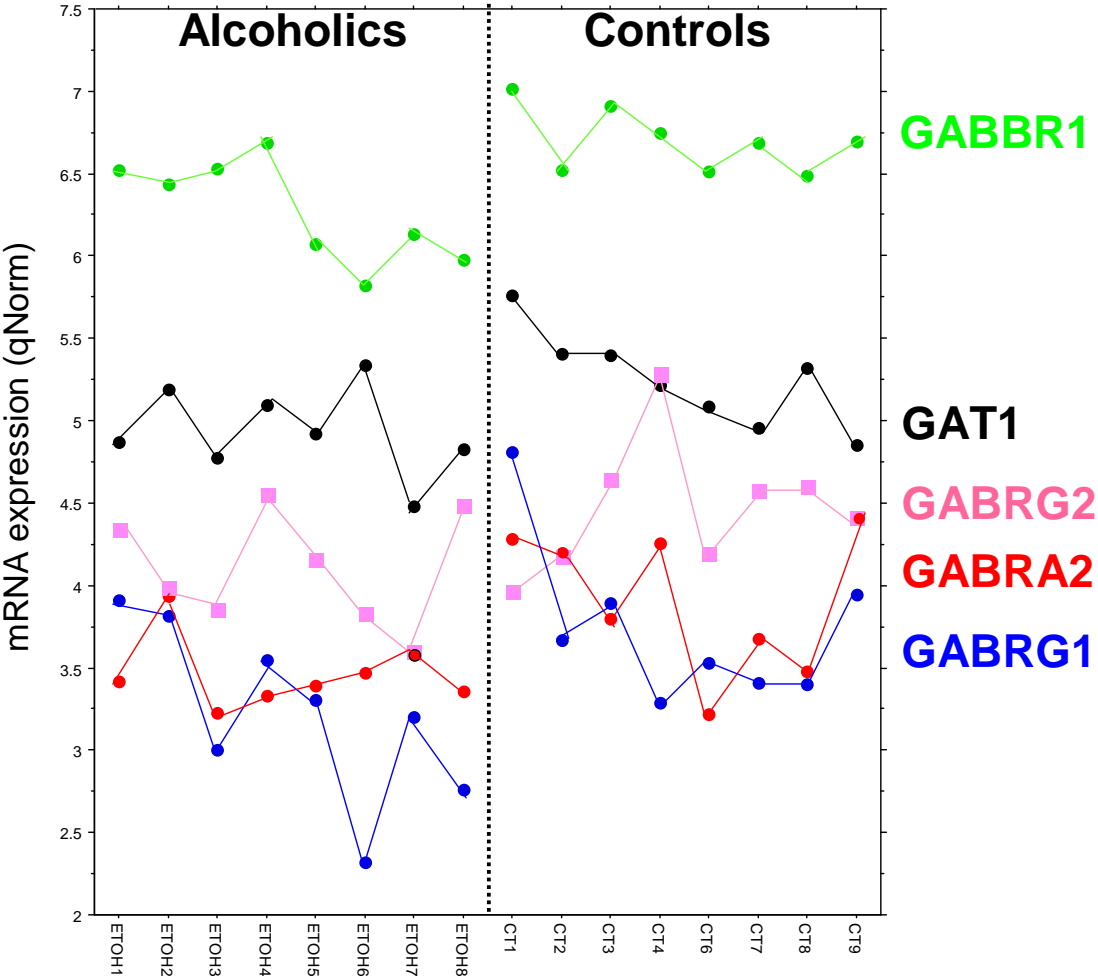

ETOH1 – ETOH8, CT1 – CT9: 8 alcoholics and 8 controls respectively  
qNorm = log2 transformed, quantile normalized mRNA expression levels
